# Supplementary material
Source: publisher figshare collection journal article supplement (https://gsajournals.figshare.com/ndownloader/files/22074891)
Supplement: Supplementary file 1 [file 22074891]

>pLENT-dTN-THmus.dna (9255 bp)

CTTATCGCCACTGGCAGCAGCCACTGGTAACAGGATTAGCAGAGCGAGGTATGTAGGCGGTGCTACAGAGTTCTTGAAGT

GGTGGCCTAACTACGGCTACACTAGAAGGACAGTATTTGGTATCTGCGCTCTGCTGAAGCCAGTTACCTTCGGAAAAAGA

GTTGGTAGCTCTTGATCCGGCAAACAAACCACCGCTGGTAGCGGTGGTTTTTTTGTTTGCAAGCAGCAGATTACGCGCAG

AAAAAAAGGATCTCAAGAAGATCCTTTGATCTTTTCTACGGGGTCTGACGCTCAGTGGAACGAAAACTCACGTTAAGGGA

TTTTGGTCATGAGATTATCAAAAAGGATCTTCACCTAGATCCTTTTAAATTAAAAATGAAGTTTTAAATCAATCTAAAGT

ATATATGAGTAAACTTGGTCTGACAGTTACCAATGCTTAATCAGTGAGGCACCTATCTCAGCGATCTGTCTATTTCGTTC

ATCCATAGTTGCCTGACTCCCCGTCGTGTAGATAACTACGATACGGGAGGGCTTACCATCTGGCCCCAGTGCTGCAATGA

TACCGCGAGACCCACGCTCACCGGCTCCAGATTTATCAGCAATAAACCAGCCAGCCGGAAGGGCCGAGCGCAGAAGTGGT

CCTGCAACTTTATCCGCCTCCATCCAGTCTATTAATTGTTGCCGGGAAGCTAGAGTAAGTAGTTCGCCAGTTAATAGTTT

GCGCAACGTTGTTGCCATTGCTACAGGCATCGTGGTGTCACGCTCGTCGTTTGGTATGGCTTCATTCAGCTCCGGTTCCC

AACGATCAAGGCGAGTTACATGATCCCCCATGTTGTGCAAAAAAGCGGTTAGCTCCTTCGGTCCTCCGATCGTTGTCAGA

AGTAAGTTGGCCGCAGTGTTATCACTCATGGTTATGGCAGCACTGCATAATTCTCTTACTGTCATGCCATCCGTAAGATG

CTTTTCTGTGACTGGTGAGTACTCAACCAAGTCATTCTGAGAATAGTGTATGCGGCGACCGAGTTGCTCTTGCCCGGCGT

CAATACGGGATAATACCGCGCCACATAGCAGAACTTTAAAAGTGCTCATCATTGGAAAACGTTCTTCGGGGCGAAAACTC

TCAAGGATCTTACCGCTGTTGAGATCCAGTTCGATGTAACCCACTCGTGCACCCAACTGATCTTCAGCATCTTTTACTTT

CACCAGCGTTTCTGGGTGAGCAAAAACAGGAAGGCAAAATGCCGCAAAAAAGGGAATAAGGGCGACACGGAAATGTTGAA

TACTCATACTCTTCCTTTTTCAATATTATTGAAGCATTTATCAGGGTTATTGTCTCATGAGCGGATACATATTTGAATGT

ATTTAGAAAAATAAACAAATAGGGGTTCCGCGCACATTTCCCCGAAAAGTGCCACCTGACGTCTAAGAAACCATTATTAT

CATGACATTAACCTATAAAAATAGGCGTATCACGAGGCCCTTTCGTCTCGCGCGTTTCGGTGATGACGGTGAAAACCTCT

GACACATGCAGCTCCCGGAGACGGTCACAGCTTGTCTGTAAGCGGATGCCGGGAGCAGACAAGCCCGTCAGGGCGCGTCA

GCGGGTGTTGGCGGGTGTCGGGGCTGGCTTAACTATGCGGCATCAGAGCAGATTGTACTGAGAGTGCACGATATGCGGTG

TGAAATACCGCACAGATGCGTAAGGAGAAAATACCGCATCAGGCGCCATTCGCCATTCAGGCTGCGCAACTGTTGGGAAG

GGCGATCGGTGCGGGCCTCTTCGCTATTACGCCAGCTGGCGAAAGGGGGATGTGCTGCAAGGCGATTAAGTTGGGTAACG

CCAGGGTTTTCCCAGTCACGACGTTGTAAAACGACGGCCAGTGCCAAGCTCCTCGAGGAACATAAAGCGTACCTCCCTTG

AGGCTCACCTGTTCTTTTATACTACCCCTTTCCACCCCACACCGTCCCCATCGATTAGAGCCGTGCTTCCCCAGGGCAGT

GCGAGTGCGCGCTGCACGCTGCTATCGTCCCTCACATGACGTCTGCACATGTCCACGCTCGCCCGCCCGCCGGCCTCACC

GCCCCCCACGCACACCCCTCCGCGTCTTTCCCTGACGCGCTGTGGTGCGCTGCGTGTCGGTGGCGGCGGCATATACGGGT

GCCAGCTTTCTTTTTCATACGGAAAATTATGGCAAAAGAACGATGTACCCCATTTTTCTTGCCACTGTCTCTTCAGAAAA

CCACAAAAAACCCACAAAAACAAAAAACAAAATAAAACATAACAACACCACACAGCAAGACAGCCAGTCAACAGGACAAC

AGCAGCAAGAAGGACAACACCACTGTGAGAGAGCAGGCATTGCTTTCTGGGAAGGACGACACACAGCACGCGTAGCTTAT

CCTCTCAGTGCAATGGCAGACAGCAACGTGTCTTCTTCTGCCCTCCCACACTCCCTTCCCCCATCCCACCCCCCTAACCC

CAATCCTGCTGCTTCTCTGCTGCCTTCAGTCCACCACGACGATCACAACCATCATTGTGCATCTCCCCCGCTCCTCCCTC

TCCCCGTCCCCATGCATGCATACTACCACACATCCCAACCCCACACTCCTGCTGCCTCGTCCCTGCCTGCCCTCCTCATT

CGCTCTCATTTTTTATTTTGATTTCCCCCTTACCGTATCATTCGCGTAATTATTCATTATCCATTTCCTGGTTTCCTGGA

TTTTCCTGCATTTATTCCATTTTCTGGAATATACTGCATTTATTCATTTATTCTATTTTCCTGCATTATTCCATTTTCTG

GAATATCCTGCATTTATTCTATTTTCCTGCATTTATTCCATTTCCCGTCATCTGGAATTTACCTGCACCCCGTGCATTGC

CACCTGCTCTTCCCGTGCCTTCTCTCTTGGCACGACAACGCACACAACCCATTCACGATCGGACCGCGCATCCAAACCCC

CCAAAACACACACCAACAACATAATCAAATATAGGTGTGTCCCACCCTGTAAATACGCCTCTATACTTATAACCCCCTCC

CTTTAGACACCTCTTTTCCCGTTGCGTCGTCGCACACAACACACACACACACATACCCACACAACAGCACCAAGCTTATG

GTGAGCAAGGGCGAGGAGGTCATCAAAGAGTTCATGCGCTTCAAGGTGCGCATGGAGGGCTCCATGAACGGCCACGAGTT

CGAGATCGAGGGCGAGGGCGAGGGCCGCCCCTACGAGGGCACCCAGACCGCCAAGCTGAAGGTGACCAAGGGCGGCCCCC

TGCCCTTCGCCTGGGACATCCTGTCCCCCCAGTTCATGTACGGCTCCAAGGCGTACGTGAAGCACCCCGCCGACATCCCC

GATTACAAGAAGCTGTCCTTCCCCGAGGGCTTCAAGTGGGAGCGCGTGATGAACTTCGAGGACGGCGGTCTGGTGACCGT

GACCCAGGACTCCTCCCTGCAGGACGGCACGCTGATCTACAAGGTGAAGATGCGCGGCACCAACTTCCCCCCCGACGGCC

CCGTAATGCAGAAGAAGACCATGGGCTGGGAGGCCTCCACCGAGCGCCTGTACCCCCGCGACGGCGTGCTGAAGGGCGAG

ATCCACCAGGCCCTGAAGCTGAAGGACGGCGGCCACTACCTGGTGGAGTTCAAGACCATCTACATGGCCAAGAAGCCCGT

GCAACTGCCCGGCTACTACTACGTGGACACCAAGCTGGACATCACCTCCCACAACGAGGACTACACCATCGTGGAACAGT

ACGAGCGCTCCGAGGGCCGCCACCACCTGTTCCTGGGGCATGGCACCGGCAGCACCGGCAGCGGCAGCTCCGGCACCGCC

TCCTCCGAGGACAACAACATGGCCGTCATCAAAGAGTTCATGCGCTTCAAGGTGCGCATGGAGGGCTCCATGAACGGCCA

CGAGTTCGAGATCGAGGGCGAGGGCGAGGGCCGCCCCTACGAGGGCACCCAGACCGCCAAGCTGAAGGTGACCAAGGGCG

GCCCCCTGCCCTTCGCCTGGGACATCCTGTCCCCCCAGTTCATGTACGGCTCCAAGGCGTACGTGAAGCACCCCGCCGAC

ATCCCCGATTACAAGAAGCTGTCCTTCCCCGAGGGCTTCAAGTGGGAGCGCGTGATGAACTTCGAGGACGGCGGTCTGGT

GACCGTGACCCAGGACTCCTCCCTGCAGGACGGCACGCTGATCTACAAGGTGAAGATGCGCGGCACCAACTTCCCCCCCG

ACGGCCCCGTAATGCAGAAGAAGACCATGGGCTGGGAGGCCTCCACCGAGCGCCTGTACCCCCGCGACGGCGTGCTGAAG

GGCGAGATCCACCAGGCCCTGAAGCTGAAGGACGGCGGCCACTACCTGGTGGAGTTCAAGACCATCTACATGGCCAAGAA

GCCCGTGCAACTGCCCGGCTACTACTACGTGGACACCAAGCTGGACATCACCTCCCACAACGAGGACTACACCATCGTGG

AACAGTACGAGCGCTCCGAGGGCCGCCACCACCTGTTCCTGTACGGCATGGACGAGCTGTACAAGTAGACTAGTATGCAT

TCTACTTTTCCCGACGGTACAGTGAAAGAATGTGCGTCTTGGCAGTGAAAGCTCCGAAGTGGTGGAGAGAGGGGTGATTG

CCAAGTGGCGTCATGGTATGGCGTCACGAGGCCGTTCTTTCTTTTTGTTACCTGTGCTTAAACTGCAGGACGCTACGCAC

ATTACAGCGTTTCCCCGTGGCTACTTTTGTCAAACAAGCATATCCTCGGCTCCTCTACGTTGAACCTCCGCGGTGAACAC

AAGGACCGGGGCAAGGCATATCAAAATTTTCCTTTTATCGTATTTTTTATGCTCACCGTTCGCTACTATTCAAGAAGTGT

TATGTTACCTTGTGCAACGCTACTCCGATGTGGGTAGTACGGAAGGCTACGCGTGGAACAACAACGAACAAAAAAACACA

GCAGAAGACCGAGGTGTCTTCCTGTTGAAGCAAACCAAACTGTGCTGTACAACTAACATGGCAGTTACGAGCCGCTATTT

TTTTTGGTATAGAGTTCACTACGACACACGTGCCCTCTAATAGCACGCTTCCTAAAGACACATCTAGTGTGGTCACTCTT

CTGAATGGGTACACTGATGTCGTCCTCTGCTGCATCGCGGATCTGAGGACAGTACTACTTTCAAATTTAGTTTCTCTTAC

TCTCCATTTCCTTCTCCTCGTCCGTCCGTTTAGTCTATCTACTTTACCGATAGTATTGAATTACGAGTGAGTTAAACTTA

CGAGTTCTACAACCAACTTAACGTACAATTTTTCAATTTCAAAAAGAAACGAATTCATGATTGAACAAGATGGATTGCAC

GCAGGTTCTCCGGCCGCTTGGGTGGAGAGGCTATTCGGCTATGACTGGGCACAACAGACAATCGGCTGCTCTGATGCCGC

CGTGTTCCGGCTGTCAGCGCAGGGGCGCCCGGTTCTTTTTGTCAAGACCGACCTGTCCGGTGCCCTGAATGAACTGCAGG

ACGAGGCAGCGCGGCTATCGTGGCTGGCCACGACGGGCGTTCCTTGCGCAGCTGTGCTCGACGTTGTCACTGAAGCGGGA

AGGGACTGGCTGCTATTGGGCGAAGTGCCGGGGCAGGATCTCCTGTCATCTCACCTTGCTCCTGCCGAGAAAGTATCCAT

CATGGCTGATGCAATGCGGCGGCTGCATACGCTTGATCCGGCTACCTGCCCATTCGACCACCAAGCGAAACATCGCATCG

AGCGAGCACGTACTCGGATGGAAGCCGGTCTTGTCGATCAGGATGATCTGGACGAAGAGCATCAGGGGCTCGCGCCAGCC

GAACTGTTCGCCAGGCTCAAGGCGCGCATGCCCGACGGCGAGGATCTCGTCGTGACCCATGGCGATGCCTGCTTGCCGAA

TATCATGGTGGAAAATGGCCGCTTTTCTGGATTCATCGACTGTGGCCGGCTGGGTGTGGCGGACCGCTATCAGGACATAG

CGTTGGCTACCCGTGATATTGCTGAAGAGCTTGGCGGCGAATGGGCTGACCGCTTCCTCGTGCTTTACGGTATCGCCGCT

CCCGATTCGCAGCGCATCGCCTTCTATCGCCTTCTTGACGAGTTCTTCTGAAGATCTAGAGCCCGAGCGAGCGAGCCGAG

GGCCGGGCGTGTGTGAGGTCAGCGTAGCGGGTTGTCGTTGGTGCGCGCGATGCGCCACCGTCAACAACACTTCCCCCCCT

CCCCCCCAAACCGGCCAGCTGCCCCGCAACTCTCTTTTCTTCTTTTCTGTACCGGCATCTTCTTTTTCCTTTCTTCCCTT

TTTCTTTTTGTCTTTGGCTCTCCCCCTACGCACAGCCCCACTTTTCACTTCCCCGCCGCAGCGCTGCTGTGCCTCGCATT

CTCTTGGCGGCGCAGCAGCAGTGCGTGCGGTGCGCGCGACATGAGGAGGGGGTTGAGGGGGGGCCCCGACGGGGCAAAAA

GACACACAGACACACAAGTAAAATCGCGATTTTTTTTGGAATGCAAAAAAGCAACAACGACAGCGGCAGGCGTGCGTGCG

CGTGCACGCCGTGTCCGCGGATGTACACGCAATTATGCAGAGAAACACCGCCGCGCTGGTGAGGCGGCCCGCGGGCACGC

TGGCGTGCAGGCACTCCACACTTCACACCCACACGAAAGCGTGCACACACCGGATGGTGGGCGTGCGCTTGTGTGTGTGC

GTGTGTCTGTGTCGGTGTGTCAACAACGATCCAGCGTGAAAGAGAGAGCGAACAAAAAAATGGAAAGACAACGTACTGGC

GTCATCTTCTTGCGCGTCTGACTTCTGCTGTGTTCTTCAAAAGTTGTGAAGACACCTGGGGCAGACGAAAGCGCCACGTA

GCACGCGTCACCCACCGCGGAGAAAAACACACAAAAAAATGCACAAGAATGCAAAGCGCAACATGACGCACAAAACAAGA

GAGGGCAGGATCAGAGGGAGAAGAAGAGACAAGAAACGGAAAGTCAAAAGAATAATATGATAAGGTTGAAGGCAGAAGAA

GATGCACATCAGTGCGGCCCATCTGTTCTTCACCCTTGGCTGATAGACTCCCTTGCGGGGGGCCGCTTCGGCATCCCAAG

GTGCGCCAAAATGCGCACCAAAACACTCGTGTACAACCAAAAACGAATGACACCCATCCTACTCCGCACTCTCTCCACGT

TCTCATCCTCTTCCACATTTGTTTCTCGACACGCTTCCCACAAATATTCTCACAAACACCCAAACACCACACAAATCGTC

CAAAACGACCCCAATTTCAGTCCCTTTTCACTCTCTAAACCCCTTCAAACACCCCCAACCCCTTCCCCCCCACTTTCACC

CATATGGAGATCCAGCAGGCGGAGAAAGAGGGAAGTATAAGGCGGACGCATAGGTCGGAGTATCGAGAAAAAGAGGCAGA

GATGGGTGGTGGCGGAGCGCCCCTCTCTGCCCTTCTCTGTTTTACTGTTCCCGCCACGTCGCCAACTCCTCTTTTTGTTT

GCTCTAATGTCGGTGCTATCCTCTTCCTCTTTTTACTCTCCGTTTTTCTTCCTTCCGTTTTGTCTTGTTATCACCGTTAT

TTTTCTTCTTCTTTCTTAGCCGATTTGGGTCTCCTGCCTACGGCAGCGGTGATGAGTCGCACTTCCGTCCCCCTTTCCTC

TCCGTAAGTACTCCCTCGATGCCTCAGGCGCTTCTATTTTGCGGCACTGTGCTGACCACCTCCCACGTGTGCAGTGAGAG

CGCCAGAGACATTCAGGAGAAGAGGGAAGAGGGGAAGTAAATACCAAAGCGAGGAAGATGTCTTTCTCGCTGCTTCTCAT

CCTGTTGACCGGTGTGCACGGCGGTGTGTCCTCTCGGCTTCCCTCCTCCTTCCCTCGCTCCCCTTTTTCTGTGTTTTTTC

TTTCTAACATGATTGCGCCTGCTCTTTTTGCCCCGCAGCGTCGCAGTGGGTGTCACCTGCGACCGCCGTACGTTTTACTA

TATACATATTTGTTTCTGTGCTGATGCCATTTGTCCGCTACTCCATATCGTGCGTGTTTGTTTTCCAGTGGTGACGCCTT

CCGCATCATTTTAATCAATTCGAGGCGAAAAGGGTGATTTGAGTGTTGGAGTGGGCTTTTTTATTTATTTGACTCCAAAC

ATCTTTTCTTTTCCCGGTATCTTCGGGTCCGTCACGCAGGTCGGTGGGTGTGTCCGAGTGCGCTTCTTTACTCACGTGCC

GCTGCGCACATACACAGATTTTAAAAGCACGCATACACGATCTGTGCCTTCAAAACTAATCAACAAAAACAAAAATACAA

AAAAGACAAGAATAAGAGGTCAGCAACGCACCCACGGCTCCTTTCTTCCTGATCCACGTCGTGGCCGCTGTACGCTCTCA

AACACGCTTTGGCGCTGATGCGTGCCTTTATACAAAGAACAAAGAAGAAGCGAAAAACGGGAGCGTGTTGCTTTGGGGAT

GTATGCGTGCCACAGTTCTGCGGTACAATTCGTAATCATGGTCATAGCTGTTTCCTGTGTGAAATTGTTATCCGCTCACA

ATTCCACACAACATACGAGCCGGAAGCATAAAGTGTAAAGCCTGGGGTGCCTAATGAGTGAGCTAACTCACATTAATTGC

GTTGCGCTCACTGCCCGCTTTCCAGTCGGGAAACCTGTCGTGCCAGCTGCATTAATGAATCGGCCAACGCGCGGGGAGAG

GCGGTTTGCGTATTGGGCGCTCTTCCGCTTCCTCGCTCACTGACTCGCTGCGCTCGGTCGTTCGGCTGCGGCGAGCGGTA

TCAGCTCACTCAAAGGCGGTAATACGGTTATCCACAGAATCAGGGGATAACGCAGGAAAGAACATGTGAGCAAAAGGCCA

GCAAAAGGCCAGGAACCGTAAAAAGGCCGCGTTGCTGGCGTTTTTCCATAGGCTCCGCCCCCCTGACGAGCATCACAAAA

ATCGACGCTCAAGTCAGAGGTGGCGAAACCCGACAGGACTATAAAGATACCAGGCGTTTCCCCCTGGAAGCTCCCTCGTG

CGCTCTCCTGTTCCGACCCTGCCGCTTACCGGATACCTGTCCGCCTTTCTCCCTTCGGGAAGCGTGGCGCTTTCTCAATG

CTCACGCTGTAGGTATCTCAGTTCGGTGTAGGTCGTTCGCTCCAAGCTGGGCTGTGTGCACGAACCCCCCGTTCAGCCCG

ACCGCTGCGCCTTATCCGGTAACTATCGTCTTGAGTCCAACCCGGTAAGACACGA
